# Supplementary material for: Natural HIV-1 Nef Polymorphisms Impair SERINC5 Downregulation Activity
Source: PubMed Central journal article supplement — Cell Rep. Author manuscript; Available in PMC 2019 Dec 21. (PMC6925589; doi:10.1016/j.celrep.2019.10.007), 2019-11-05
Supplement: NIHMS1542670-supplement-1.pdf [file NIHMS1542670-supplement-1.pdf]

**Cell Reports, Volume 29**

**Supplemental Information**

**Natural HIV-1 Nef Polymorphisms Impair**

**SERINC5 Downregulation Activity**

**Steven W. Jin, Nirmin Alsaifi, Xiaomei T. Kuang, Shayda A. Swann, Mako Toyoda, Heinrich Göttlinger, Bruce D. Walker, Takamasa Ueno, Andrés Finzi, Zabrina L. Brumme, and Mark A. Brockman**

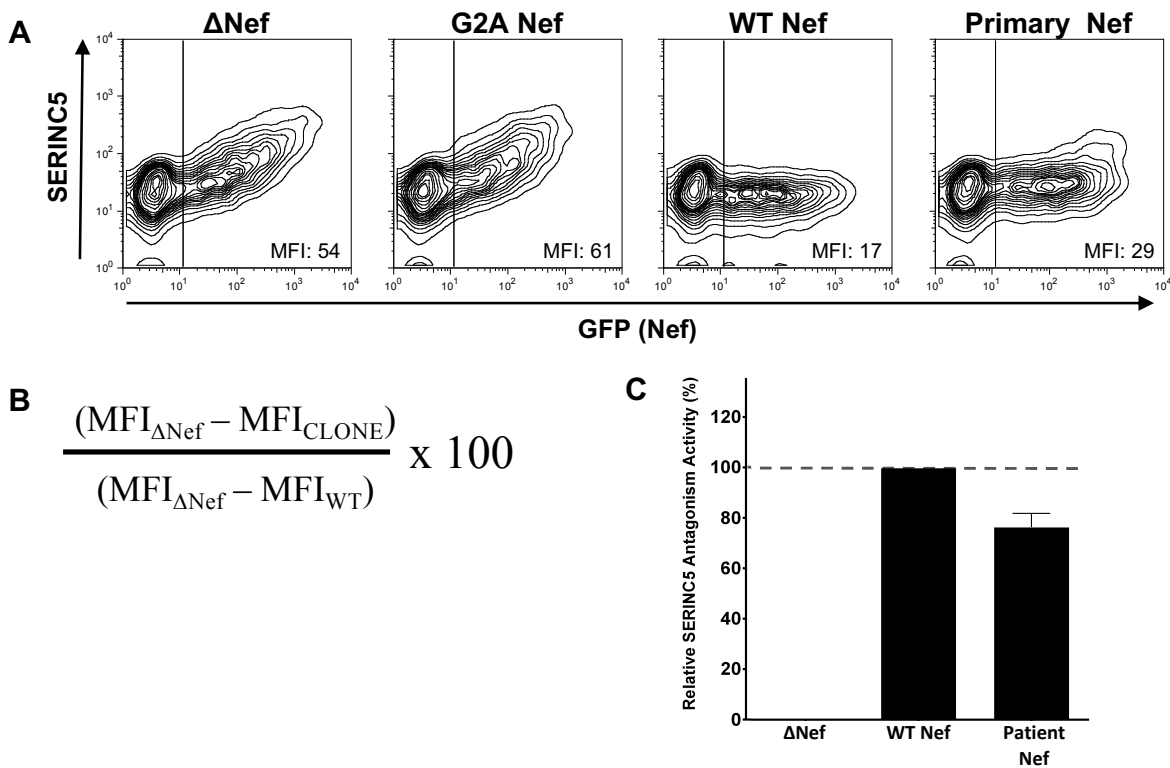

**Figure S1. Assay to measure SERINC5 downregulation by primary Nef alleles, Related to Figure 1 and STAR Methods. (A)** SERINC5 expression on the cell surface was assessed by flow cytometry following transient expression of Nef and a SERINC5 variant encoding an internal HA epitope tag (SERINC-iHA). Results are shown for two negative controls, empty vector ( $\Delta$ Nef) and Nef G2A mutant, a positive control, WT Nef (SF2 strain), and one representative primary Nef allele. Median fluorescence intensity (MFI) for SERINC5 (y-axis) in the transfected cell population (GFP+, x-axis) are indicated. In repeated experiments, the MFI values obtained using empty vector ( $\Delta$ Nef) and Nef G2A mutant were not discernable. **(B)** SERINC5 MFI values for each primary Nef allele were normalized to those of WT Nef (set to 100%) and G2A Nef (set to 0%) using the indicated formula. **(C)** Normalized SERINC5 downregulation activity (mean  $\pm$  S.D.) is shown for controls and one representative primary Nef clone, based on three independent experiments.

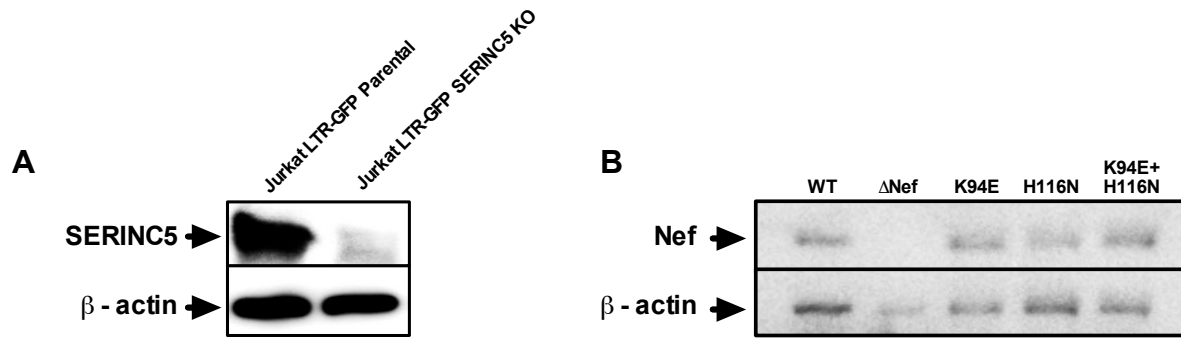

**Figure S2. Generation of SERINC5 knockout Jurkat LTR-GFP reporter cells, Related to Figure 3.** (A) CRISPR/Cas9 methods were used to disrupt the SERINC5 gene in Jurkat LTR-GFP reporter cells. Single cells were then isolated by FACS sorting and expanded to generate clonal cells lines. Loss of SERINC5 expression was confirmed by Western blot using a rabbit polyclonal anti-SERINC5 antiserum. Results for one SERINC5 KO clone are shown. (B) Western blot analysis was used to confirm the presence or absence of Nef in NL4.3-derived viruses following infection of Jurkat LTR-GFP SERINC5 KO cells. Cells were harvested on day 9 of the replication assay shown in Figure 3E.
